# Supplementary material
Source: MDPI journal article supplement (https://www.mdpi.com/2073-4441/12/9/2450)
Supplement: s1 [file s1]

# Supplementary material

## Low-temperature adapted nitrifying microbial community of Finnish wastewater treatment systems

Antonina Kruglova<sup>1,\*</sup>, Jenni Kesulahti<sup>1</sup>, Khoi Minh Le<sup>1</sup>, Anna Mikola<sup>1</sup>, Alejandro Gonzalez-Martinez<sup>2</sup>, Riku Vahala<sup>1</sup>

<sup>1</sup> Aalto University, P.O.Box 15200, FI-00076 AALTO, Tietotie 1E, Espoo, Finland

<sup>2</sup> Institute of Water Research, University of Granada, Granada, Spain

\*Corresponding author, antonina.kruglova@aalto.fi

*Table 1S. Operational parameters, analysed during the study and Standard Methods*

| Analysis                          | Method                    |
|-----------------------------------|---------------------------|
| COD <sub>Cr</sub>                 | SFS 5504:1988             |
| BOD <sub>7(ATU)</sub>             | SFS-EN 1899-1, OxiTop     |
| P <sub>tot</sub>                  | SFS-EN ISO 6878:2004, FIA |
| N <sub>tot</sub>                  | SFS-EN-ISO 11905-1 (1998) |
| NO <sub>2</sub> , NO <sub>3</sub> | SFS-EN-ISO 13395, FIA     |
| NH <sub>4</sub>                   | ISO 11732:2005, FIA       |
| MLSS                              | SFS-EN 12880:2000         |
| SS                                | SFS-EN 872:2005           |
| pH                                | SFS 3021:1979             |

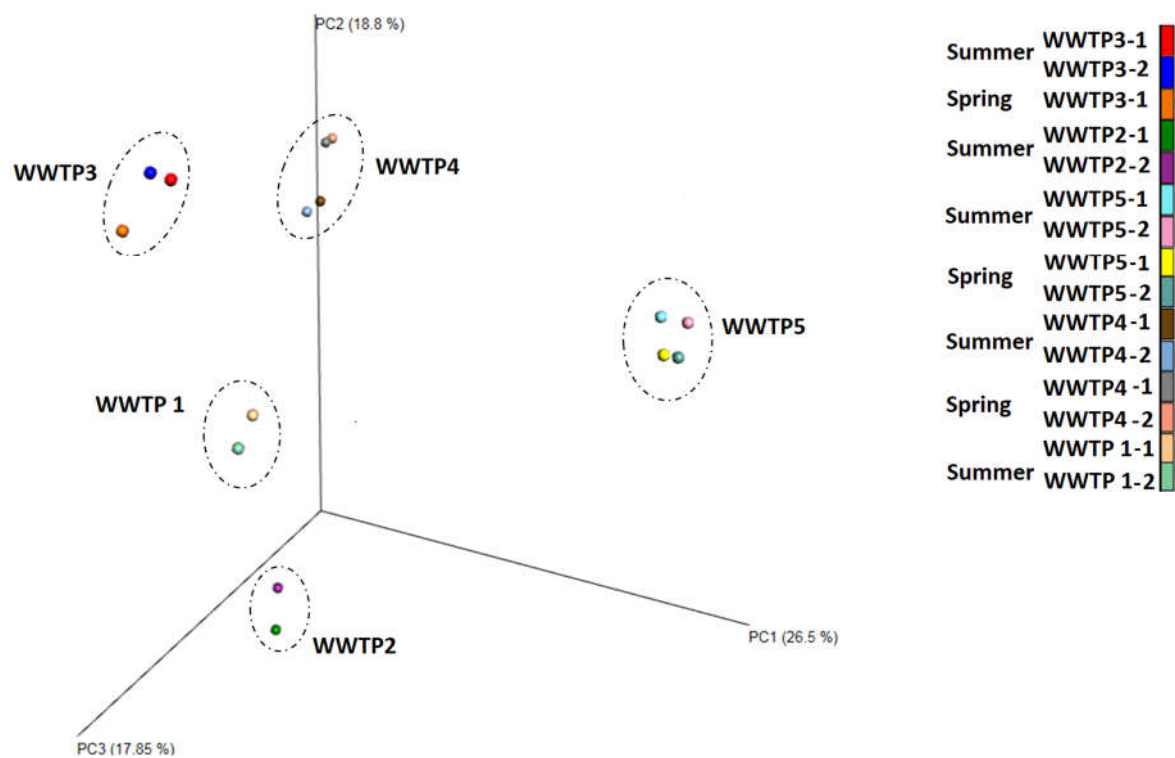

**Figure 1S.** Bray-Curtis PCoA plot showing the clustering of the samples from different WWTPs (clusters demonstrated by dashed lines).

**Table 2S.** Microbial communities of Finnish wastewater treatment plants (WWTPs) during the spring season.

| Phylum         | Class               | Order               | Spring |   |       |   |       |   |       |   |       |   |
|----------------|---------------------|---------------------|--------|---|-------|---|-------|---|-------|---|-------|---|
|                |                     |                     | WWTP1  |   | WWTP2 |   | WWTP3 |   | WWTP4 |   | WWTP5 |   |
|                |                     |                     | 1      | 2 | 1     | 2 | 1     | 2 | 1     | 2 | 1     | 2 |
| Acidobacteria  | Acidobacteriia      | Acidobacteriales    |        |   |       |   |       |   |       |   |       |   |
| Actinobacteria | Acidimicrobiia      | Acidimicrobiales    |        |   |       |   |       |   |       |   |       |   |
|                | Actinobacteria      | Actinomycetales     |        |   |       |   |       |   |       |   |       |   |
|                |                     | Corynebacteriales   |        |   |       |   |       |   |       |   |       |   |
|                |                     | Micrococcales       |        |   |       |   |       |   |       |   |       |   |
|                |                     | Propionibacteriales |        |   |       |   |       |   |       |   |       |   |
|                |                     | Unclassified        |        |   |       |   |       |   |       |   |       |   |
|                | Thermoleophilia     | Solirubrobacterales |        |   |       |   |       |   |       |   |       |   |
|                | Unclassified        | Unclassified        |        |   |       |   |       |   |       |   |       |   |
| Bacteroidetes  | Cytophagia          | Cytophagales        |        |   |       |   |       |   |       |   |       |   |
|                | Flavobacteriia      | Flavobacteriales    |        |   |       |   |       |   |       |   |       |   |
|                | Sphingobacteriia    | Sphingobacteriales  |        |   |       |   |       |   |       |   |       |   |
| Chloroflexi    | Chloroflexia        | Unclassified        |        |   |       |   |       |   |       |   |       |   |
|                | Unclassified        | Unclassified        |        |   |       |   |       |   |       |   |       |   |
| Firmicutes     | Bacilli             | Lactobacillales     |        |   |       |   |       |   |       |   |       |   |
|                | Clostridia          | Clostridiales       |        |   |       |   |       |   |       |   |       |   |
| Proteobacteria | Alphaproteobacteria | Rhizobiales         |        |   |       |   |       |   |       |   |       |   |
|                |                     | Rhodobacterales     |        |   |       |   |       |   |       |   |       |   |
|                |                     | Rhodospirillales    |        |   |       |   |       |   |       |   |       |   |
|                |                     | Sphingomonadales    |        |   |       |   |       |   |       |   |       |   |
|                | Betaproteobacteria  | Burkholderiales     |        |   |       |   |       |   |       |   |       |   |
|                |                     | Gallionellales      |        |   |       |   |       |   |       |   |       |   |
|                |                     | Rhodocyclales       |        |   |       |   |       |   |       |   |       |   |
|                | Gammaproteobacteria | Pseudomonadales     |        |   |       |   |       |   |       |   |       |   |
|                |                     | Xanthomonadales     |        |   |       |   |       |   |       |   |       |   |
|                | Unclassified        | Unclassified        |        |   |       |   |       |   |       |   |       |   |
| Others (%)     |                     |                     |        |   |       |   |       |   |       |   |       |   |

Color code (%)

|  |      |
|--|------|
|  | 0    |
|  | 0.01 |
|  | 0.2  |
|  | 0.5  |
|  | 0.8  |
|  | 1    |
|  | 5    |
|  | 7.5  |
|  | 10   |
|  | 15   |
|  | 20   |
|  | 25   |

**Table 3S.** Microbial communities of Finnish wastewater treatment plants (WWTPs) during the summer season.

| Phylum         | Class                | Order               | Summer |   |       |   |       |   |       |   |       |   |
|----------------|----------------------|---------------------|--------|---|-------|---|-------|---|-------|---|-------|---|
|                |                      |                     | WWTP1  |   | WWTP2 |   | WWTP3 |   | WWTP4 |   | WWTP5 |   |
|                |                      |                     | 1      | 2 | 1     | 2 | 1     | 2 | 1     | 2 | 1     | 2 |
| Acidobacteria  | Acidobacteriia       | Acidobacteriales    |        |   |       |   |       |   |       |   |       |   |
|                | Holophagae           | Holophagales        |        |   |       |   |       |   |       |   |       |   |
| Actinobacteria | Acidimicrobiia       | Acidimicrobiales    |        |   |       |   |       |   |       |   |       |   |
|                | Actinobacteria       | Actinomycetales     |        |   |       |   |       |   |       |   |       |   |
|                |                      | Micrococcales       |        |   |       |   |       |   |       |   |       |   |
|                |                      | Propionibacteriales |        |   |       |   |       |   |       |   |       |   |
|                |                      | Unclassified        |        |   |       |   |       |   |       |   |       |   |
|                | Thermoleophila       | Solirubrobacterales |        |   |       |   |       |   |       |   |       |   |
|                | Unclassified         | Unclassified        |        |   |       |   |       |   |       |   |       |   |
| Bacteroidetes  | Cytophagia           | Cytophagales        |        |   |       |   |       |   |       |   |       |   |
|                | Flavobacteriia       | Flavobacteriales    |        |   |       |   |       |   |       |   |       |   |
|                | Sphingobacteriia     | Sphingobacteriales  |        |   |       |   |       |   |       |   |       |   |
|                |                      | Unclassified        |        |   |       |   |       |   |       |   |       |   |
| Chloroflexi    | Caldilineae          | Caldilineales       |        |   |       |   |       |   |       |   |       |   |
|                | Chloroflexia         | Unclassified        |        |   |       |   |       |   |       |   |       |   |
| Firmicutes     | Bacilli              | Lactobacillales     |        |   |       |   |       |   |       |   |       |   |
|                | Clostridia           | Clostridiales       |        |   |       |   |       |   |       |   |       |   |
| Planctomycetes | Planctomycetia       | Planctomycetales    |        |   |       |   |       |   |       |   |       |   |
| Proteobacteria | Alphaproteobacteria  | Rhizobiales         |        |   |       |   |       |   |       |   |       |   |
|                |                      | Rhodobacterales     |        |   |       |   |       |   |       |   |       |   |
|                |                      | Sphingomonadales    |        |   |       |   |       |   |       |   |       |   |
|                | Betaproteobacteria   | Burkholderiales     |        |   |       |   |       |   |       |   |       |   |
|                |                      | Rhodocyclales       |        |   |       |   |       |   |       |   |       |   |
|                | Gammaaproteobacteria | Xanthomonadales     |        |   |       |   |       |   |       |   |       |   |
| Others (%)     |                      |                     |        |   |       |   |       |   |       |   |       |   |

color code (%)

|  |      |
|--|------|
|  | 0    |
|  | 0.01 |
|  | 0.2  |
|  | 0.5  |
|  | 0.8  |
|  | 1    |
|  | 5    |
|  | 10   |
|  | 20   |
|  | 30   |
|  | ≥40  |
